1 A bacterial chaperone is required for plastid  
2 function in malaria parasites

3

4

5

6 Anat Florentin<sup>1,2</sup>, David W Cobb<sup>1</sup>, Jillian D Fishburn<sup>1</sup>, Paul S Kim<sup>2</sup>, Manuel A  
7 Fierro<sup>1</sup>, Vasant Muralidharan<sup>1,2\*</sup>

8

9 <sup>1</sup> Department of Cellular Biology

10 <sup>2</sup> Center for Tropical and Emerging Global Diseases

11 University of Georgia, Athens, Georgia, United States of America

12

13 \* Corresponding author:

14 E-mail: [vasant@uga.edu](mailto:vasant@uga.edu) (VM)

15

## 1 **Author Contributions**

- 2 Conceived and designed the experiments: AF VM.
- 3 Performed the experiments: AF DWC JDF PSK MAF VM.
- 4 Analyzed the data: AF DWC JDF VM
- 5 Wrote the paper: AF VM
- 6

## 1 **Abstract**

2 Apicomplexan parasites such as *Plasmodium falciparum*, the causative agent of  
3 malaria, contain a non-photosynthetic plastid known as the apicoplast that  
4 functions to produce essential metabolic compounds. It was previously reported  
5 that several members of the Clp family of chaperones and proteases localize to  
6 the apicoplast. In bacteria and in chloroplasts these proteins form complexes that  
7 degrade proteins in a proteasome-like manner to regulate key cellular processes,  
8 but their function in the apicoplast is completely unknown. In this study, we  
9 generated a conditional mutant of the *P. falciparum* apicoplast-targeted *pfclpc*  
10 gene and found that under normal conditions it localizes to the apicoplast.  
11 Knockdown of PfClpC results in growth inhibition and morphological defects,  
12 indicating that PfClpC is essential for parasite viability. Upon inhibition, PfClpC  
13 loses its apicoplast localization and appears in vesicle-like structures. Other  
14 apicoplast-targeted proteins also localize to these structures, suggesting that  
15 organelle integrity is compromised. Addition of isopentynyl pyrophosphate  
16 completely rescued the growth inhibition, indicating that the only essential function  
17 of PfClpC is related to the apicoplast. Moreover, cellular assays suggest that  
18 PfClpC inhibition interferes with the ability of the schizont-stage parasites to  
19 properly sort functional apicoplast organelles into daughter-merozoites. These  
20 data show that PfClpC is an essential gene that functions to maintain apicoplast  
21 integrity.  
22

## 1 **Author Summary**

2 The deadly human malaria parasite, *Plasmodium falciparum*, contains a unique  
3 organelle called the apicoplast, a non-photosynthetic plastid that produces vital  
4 metabolites. Members of the prokaryotic-derived Clp family were previously  
5 reported to localize to the apicoplast. In bacteria and plant chloroplasts, Clp  
6 homologs form a proteasome-like complex that degrade proteins but their  
7 function in parasite biology is unknown. Here we took a conditional knockdown  
8 approach to study an apicoplast localized Clp proteins, PfClpC, which we found  
9 to be essential for parasite viability. Inhibition of PfClpC results in a growth arrest  
10 phenotype that correlates with a reduced replication rate. We observed that  
11 PfClpC localizes to the apicoplast, however upon inhibition it is found dispersed  
12 in vesicle-like structures suggesting a complete breakdown of organelle integrity.  
13 Our ability to rescue the phenotype by adding an essential apicoplast-derived  
14 metabolite proved that the only essential function of PfClpC is linked to  
15 apicoplast function. Furthermore, we have found evidence supporting a role for  
16 PfClpC in apicoplast sorting into daughter cells. Therefore, we propose PfClpC  
17 as a potential drug target due to its essentiality, prokaryotic origin and absence  
18 from the human host.  
19

## 1 **Introduction**

2 Malaria is a devastating human disease caused by obligate intracellular parasites  
3 of the genus *Plasmodium*. This disease results in nearly 450,000 deaths each  
4 year, which are mostly caused by one species, *Plasmodium falciparum* [1]. The  
5 life cycle of the parasite is remarkably complex, moving between different cellular  
6 niches in a mosquito vector and in the human host. Upon infection, the parasite  
7 initially invades liver cells followed by invasion into red blood cells (RBCs), where  
8 the parasite numbers expand exponentially via asexual replication. This part of  
9 the cycle initiates with the invasion of a diminutive merozoite into the RBC,  
10 developing first into the early ring, then a metabolically active trophozoite, and  
11 finally a multinucleated schizont that will give rise to multiple merozoite progeny  
12 which egress and reinvade fresh RBCs.

13 This blood stage form of the parasite is responsible for the entirety of malaria-  
14 associated morbidity and mortality. Currently, the parasite has gained resistance  
15 to all clinically available antimalarial drugs, generating an urgent need to identify  
16 new drugs and potential new drug targets [2,3]. The minute eukaryotic cell of *P.*  
17 *falciparum* is remarkably complex with two organelles that carry their own genetic  
18 material, the mitochondrion and a unique algal endosymbiont known as the  
19 apicoplast [4]. The apicoplast harbors vital metabolic pathways that are required  
20 for parasite growth and survival [5]. Importantly, drugs that target cellular  
21 processes in the apicoplast are clinically effective [6-8]. Therefore, understanding  
22 the function, structure and biogenesis of the apicoplast are essential areas of  
23 research that provide a rich vein of antimalarial drug targets.

1 The parasite specific and essential nature of the apicoplast makes the  
2 development of anti-malarial drugs targeting this organelle extremely attractive.  
3 Very little is known about the biogenesis and maintenance of the apicoplast  
4 organelle, although factors that are required for or regulate these processes may  
5 be an important source of anti-malarial drug targets. One potential class of such  
6 targets are the caseinolytic protease (Clp) family of proteins that act as key  
7 regulators of the biology of bacterial cells, the evolutionary ancestors of the  
8 apicoplast. In bacteria and plant chloroplasts, Clp proteins play vital roles in cell/  
9 organelle division, segregation, protein homeostasis and protein transport [9].  
10 Typically, they form a regulated proteolytic complex in which a Clp protease is  
11 paired with a Clp chaperone that has a AAA+ ATPase domain (also known as the  
12 Hsp100 family of chaperones) such as ClpC or ClpA [10]. There are several  
13 putative *clp* genes encoded in the *P. falciparum* genome and it was recently  
14 shown that one of them (PfHSP101) is located at the host-parasite interface and  
15 is required to transport parasite virulence factors into the infected host cell [11-13].  
16 Two other Clp proteins have been localized to the mitochondria [14] and six  
17 putative Clp's have been localized to the apicoplast [15], yet very little is known  
18 about their roles in parasite biology. Although some of their enzymatic activities  
19 have been studied *in vitro* [16], their roles *in vivo* remain poorly understood due to  
20 the challenging genetics of *P. falciparum* and the difficulty in targeting organelle  
21 localized genes for molecular study.  
22 Here we studied the role of the previously uncharacterized PfClpC  
23 (PF3D7\_1406600), an Hsp100 chaperone with a triple AAA+ ATPase domain.

1 The *pfclpc* gene is conserved in all *Plasmodium* species, as well as in other  
2 apicoplast containing *Apicomplexa*. It encodes a large protein (156 kDa) with a  
3 predicted apicoplast transit peptide. Using a conditional knockdown approach, we  
4 show that PfClpC activity is essential for parasite survival and growth. Conditional  
5 inhibition of PfClpC interferes with apicoplast integrity and the localization of  
6 apicoplast proteins. We observe a delayed growth inhibition phenotype, which  
7 results from a reduced replication rate that compounds with each subsequent  
8 replication cycle. Importantly, we can chemically rescue PfClpC-associated  
9 phenotypes using isopentenyl pyrophosphate (IPP) indicating that the only  
10 essential role of PfClpC is linked to apicoplast function. Finally, we demonstrate  
11 that even after prolonged inhibition and a general apicoplast loss, parasites are  
12 able to recover from undetectable levels and grow when PfClpC inhibition is  
13 reversed. Overall, we show that PfClpC is a vital apicoplast-targeted protein that  
14 is essential for parasite viability through its role in apicoplast function.

15

16

17

18

## 1 **Results**

### 2 **Generating conditional mutants of PfClpC**

3 In order to examine the biological role of the putative chaperone PfClpC in  
4 apicoplast function and parasite biology, we took a genetic approach based on  
5 conditional chaperone auto-inhibition. We inserted a dihydrofolate reductase  
6 (DHFR)-based destabilization domain (DDD) into the *pfclpc* genomic locus, a  
7 technique that was previously used successfully to conditionally inhibit chaperone  
8 function [13,17], as well as to knockdown other *Plasmodium* proteins [18,19] (Fig  
9 1A). In the chaperone-DDD fusion protein, the unfolded DDD binds the chaperone  
10 intra-molecularly, thereby excluding client proteins and inhibiting normal  
11 chaperone function (Fig 1A). A small molecule ligand, trimethoprim (TMP) is used  
12 to stabilize and refold the DDD, releasing the chaperone to resume its normal  
13 function (Fig 1A). Using a single crossover homologous recombination strategy,  
14 we tagged the C-terminus of the *pfclpc* gene with a triple-hemagglutinin (HA)  
15 epitope tag and the DDD (Fig 1B). We isolated two clones from two independent  
16 transfections and analyzed the *pfclpc* locus using a southern blot analysis (Fig  
17 1B). Both isolated clones were correctly tagged, and subsequent experiments  
18 were done using the two clones, 1G8 and 2E10 (Fig 1B). Henceforth, these  
19 parasite lines will also be referred to as PfClpC-DDD.

20 Using an anti-HA antibody, we confirmed expression of the PfClpC-DDD fusion  
21 protein at the expected molecular size in tagged clones but not in the parental line  
22 (Fig 1C). The subcellular localization of PfClpC in PfClpC-DDD parasites was  
23 observed using immunofluorescence microscopy (Fig 1D). We detected



1 expression of tagged PfClpC in distinctive structures throughout the asexual blood  
2 stages; punctate in early parasites, elongated in mid-stage trophozoites and  
3 multiple foci in individual merozoites in the late schizonts stages (Fig 1D).

4

### 5 **PfClpC is essential for intraerythrocytic growth of malaria parasites**

6 To test the requirement of PfClpC for parasite growth during the asexual blood  
7 stages, we removed the stabilizing ligand (TMP) from culturing media and  
8 monitored the growth of unsynchronized PfClpC-DDD parasites. A severe and  
9 dramatic growth arrest was seen in parasites after TMP withdrawal (Fig 2A). We  
10 found that inhibition of PfClpC relies on TMP in a dose-dependent manner with an  
11 EC<sub>50</sub> of 80nM (Fig 2B). As expected, based on previously described chaperone-  
12 DDD auto-inhibition model, TMP removal did not lead to PfClpC degradation, as  
13 protein levels remained constant over time (Fig 2C). Overall, these results  
14 demonstrate that PfClpC activity is essential for parasite survival and growth  
15 within human RBCs.

16

### 17 **PfClpC is required for apicoplast integrity**

18 In order to verify the subcellular localization of PfClpC, we stained cells with anti-  
19 HA and anti-acyl carrier protein (ACP), a known apicoplast marker [20], and found  
20 that the two co-localize, indicating that under normal conditions PfClpC localizes  
21 to the apicoplast (Fig 3A). After TMP removal, we observed that the integrity of  
22 the apicoplast was compromised, as observed by staining of PfClpC and ACP  
23 (Fig 3B). Inhibition of PfClpC function resulted in loss of the canonical apicoplast

1 morphology and in the appearance of PfClpC in a punctate, vesicle-like, pattern  
2 throughout the cell (Fig 3B). Moreover, this abnormal localization was also  
3 observed for ACP, which was detected in similar vesicle-like structures upon  
4 PfClpC inhibition, suggesting damage to apicoplast integrity (Fig 3B). Apicoplast  
5 targeting of nuclear encoded proteins is mediated through an N-terminal transit  
6 peptide that is cleaved in the apicoplast to produce the mature protein [21,22]. In  
7 correlation with the mislocalization of PfClpC, a second higher band for PfClpC  
8 appeared upon TMP removal, suggesting that the N-terminal transit peptide was  
9 not cleaved because it did not reach the apicoplast (S1 Fig).

10

### 11 **Intraerythrocytic development requires PfClpC**

12 In agreement with apicoplast dysfunction, PfClpC mutants developed normally  
13 during the early stages of rings and trophozoite (S2 Fig), but late schizont stages  
14 ( $\leq 6$  nuclei) developed aberrant morphology, including irregular cellular shape,  
15 empty vacuoles and fewer nuclei suggesting that these parasites are nonviable  
16 (Fig 4A). These morphologically abnormal parasites appeared on the 3<sup>rd</sup>  
17 replication cycle and their fraction increased over time (Fig 4B). Analysis of the  
18 entire population using flow cytometry revealed that instead of a single peak that  
19 usually characterizes a synchronized culture, these late-stage parasites had a  
20 wider distribution, further suggesting variation in DNA content (Fig 4C). To test the  
21 viability and replication efficiency of the mixed parasites population, we used a  
22 synchronized culture and monitored the rate of schizonts to ring conversion. In  
23 agreement with our previous results showing the presence of morphologically

1 abnormal schizonts, TMP removal resulted in a significant decrease in the  
2 numbers of parasites that were formed in each successive generation (Fig 4D).  
3 This reduced replication rate accounts for the observed growth inhibition as well  
4 as the increase in the numbers of morphologically abnormal parasites with each  
5 generation.

6

### 7 **Chemical rescue of PfClpC-DDD parasites using IPP**

8 The only essential function of the apicoplast during the blood stages is the  
9 biosynthesis of isopentenyl pyrophosphate (IPP), the precursor for all isoprenoids,  
10 through the non-mevalonate pathway [23]. To test the effect of IPP on PfClpC  
11 inhibition, we removed TMP and added IPP to the growth media of PfClpC-DDD  
12 parasites and observed normal growth as well as typical cellular morphology (Figs  
13 5A and B). Immunofluorescence microscopy revealed that IPP treated PfClpC-  
14 DDD parasites survived in the absence of a functional apicoplast and still retained  
15 the multiple vesicle-like structures containing PfClpC and ACP (Fig 5C).  
16 Moreover, quantitative Real Time PCR (qRT-PCR) analysis supported the visual  
17 observation that the apicoplast disappears from these parasites (Fig 5D).  
18 Importantly, the mitochondrial genome was not similarly affected by PfClpC  
19 inhibition indicating that, in addition to a functional damage to the apicoplast, there  
20 was an actual loss of the plastid genome (Fig 5D). Overall, we concluded that the  
21 only essential activity of PfClpC is linked to apicoplast function.

22

### 23 **The apicoplast is lost from most but not all PfClpC-DDD parasites**

1 In order to link the cellular observation of a morphologically mixed PfClpC-DDD  
2 population to the phenotypic evidence of apicoplast dysfunction, we aimed to  
3 visualize apicoplast presence or absence in early stage parasites ( $\leq 5$  hours post  
4 invasion). We used Image Stream analysis, which combines flow cytometry with  
5 imaging, to analyze these parasites and found that all parasites were positive for  
6 PfClpC (S3 Fig and S1 Table). Higher resolution microscopy confirmed that these  
7 cells contained PfClpC and that its localization appeared, even in these early  
8 stages, in a vesicle-like pattern rather than as a typical discrete apicoplast  
9 structure (S4 Fig). This suggests that either newly formed rings inherit these  
10 vesicles from their mother cell or that these vesicles represent very early *de novo*  
11 synthesis of apicoplast proteins.

12 Due to the fact that apicoplast proteins are synthesized even in absence of the  
13 organelle, they are not indicative of apicoplast loss. Therefore, we employed a  
14 functional assay to investigate whether PfClpC inhibition results in a mixed  
15 population of parasites with and without an apicoplast. We wanted to know,  
16 whether or not a small, yet viable, population of parasites containing an intact and  
17 functional apicoplast remained in PfClpC-DDD parasites cultured in the absence  
18 of TMP. To test this, we first removed TMP and allowed PfClpC-DDD parasites to  
19 grow in the presence or absence of IPP for two weeks (Fig 6A). As expected,  
20 PfClpC-DDD parasites grown without TMP and supplemented with IPP grew  
21 normally, whereas parasites incubated without TMP and without IPP were unable  
22 to grow and were undetectable for several days. On day 14 we removed IPP and  
23 relieved PfClpC inhibition by adding back TMP, and monitored the growth of the

1 parasites (Fig 6B). Upon addition of TMP to the media, parasites grown in the  
2 absence of IPP (Fig 6B) recovered and resumed normal growth, indicating that a  
3 small fraction of these parasites indeed possessed a functional apicoplast.  
4 Conversely, parasites that were grown with IPP started dying 48 hours after  
5 removing IPP and adding back TMP (Fig 6B), suggesting that these apicoplast-  
6 less parasites through continued growth had outcompeted the few remaining  
7 parasites that contained a functional apicoplast. Despite restoration of PfClpC  
8 activity, once lost, the parasite is not able to generate, *de novo*, the four-  
9 membrane apicoplast. Overall, these data indicate that PfClpC-DDD mutants  
10 grown in the absence of TMP lose the apicoplast from most parasite progeny with  
11 a small, yet observable population still retaining the plastid.

## 1 **Discussion**

2 The deadly malaria parasite, *Plasmodium falciparum*, is a eukaryotic pathogen  
3 and as such, it shares conserved basic biology with its human host. It is therefore  
4 both challenging and essential, in the search for potential drug targets, to identify  
5 key components that are absent or significantly different from the human host.

6 One such potential candidate is the apicoplast-associated prokaryotic Clp family  
7 of chaperones and proteases. In the bacterial ancestors, as well as in other  
8 organellar descendants such as the mitochondria and chloroplast, these proteins  
9 serve a variety of basic molecular functions ranging from protein degradation,  
10 transport across membranes, protein folding, cell division, stress response and  
11 pathogenicity [24]. These have placed bacterial Clp proteins at the center of  
12 several drug discovery programs, and have led to the identification of potent and  
13 specific inhibitors [25,26]. Very little is known, however, about the functional roles  
14 of the apicoplast-resident Clp proteins in the biology of *Plasmodium falciparum*.

15 In this study we identified an essential Clp family member, PfClpC, a nuclear  
16 encoded gene that is transported to the apicoplast where it is required for the  
17 integrity of the organelle. Using a conditional knockdown approach, we  
18 demonstrated that PfClpC activity is essential for parasite growth and viability  
19 (Figs 1 and 2).

20 The growth defect of PfClpC-DDD parasites is linked to a failure in apicoplast  
21 integrity in several ways. We showed that PfClpC localizes to the apicoplast under  
22 normal conditions, but appears, along with other apicoplast proteins, in vesicle like  
23 structures upon PfClpC inhibition (Fig 3). Several studies reported the appearance

1 of such structures when the apicoplast integrity is compromised, for example with  
2 the use of certain antibiotics [5,23,27]. This was interpreted as stalled vesicular  
3 transport that has left the ER but cannot dock to the apicoplast surface due to loss  
4 of the organelle.

5 Moreover, chemical rescue using IPP restored PfClpC-DDD growth as well as  
6 recovered normal cellular morphology (Fig 5). It has been shown that isoprenoid  
7 biosynthesis is the only essential metabolic function of the apicoplast, and  
8 supplementing IPP can replace a non-functional apicoplast in living parasites [23].  
9 Indeed, the IPP supplemented parasites grew normally but microscopic imaging  
10 revealed the presence of punctate structures, which are indicative of apicoplast  
11 loss (Fig 5C). This was also supported by qRT-PCR analysis that demonstrated a  
12 decrease in the ratio of nuclear to apicoplast genome, highlighting an actual loss  
13 of the organelle (Fig 5D). We therefore concluded that the only essential function  
14 of PfClpC is linked to apicoplast biology.

15 Inhibition of essential apicoplast metabolic pathways with drugs like  
16 Fosmidomycin, kills parasites immediately and does not lead to the loss of the  
17 organelle [28]. Conversely, inhibition of apicoplast translation or replication with  
18 drugs like Doxycycline, allows the parasites to complete one asexual cycle,  
19 proceed through the second replication cycle, and die only at the schizont stage of  
20 the second cycle [7,23]. Similar to the effect of drugs that inhibit apicoplast  
21 replication, PfClpC mutants develop normally during the early stages of rings and  
22 trophozoite (S2 Fig), but late schizont stages ( $\leq 6$  nuclei) exhibited aberrant  
23 morphology (Figs 4A and C). These non-viable parasites did not manifest

1 uniformly at the end of the second cycle but appeared on the 3<sup>rd</sup> replication cycle,  
2 and their fraction increased over time (Fig 4B). One possible explanation for the  
3 delayed growth arrest, as well as the gradual increase in abnormal parasites, is  
4 that PfClpC inhibition interferes with the segregation or division of functional  
5 apicoplasts into daughter merozoites. As a consequence, a mixed population of  
6 viable and non-viable daughter cells is forming after each cycle, diluting overtime  
7 the viable parasites in the total culture. Indeed, we observed a significant  
8 decrease in the rate of schizont to ring conversion in each successive generation  
9 (Fig 4D), clarifying the delayed growth inhibition, and suggesting a possible defect  
10 in apicoplast sorting.

11 Since most apicoplast resident proteins are encoded by the nucleus [20], they are  
12 expressed and sorted into vesicles despite the absence of an apicoplast and  
13 therefore could not serve as a proper indicator of apicoplast presence, even in the  
14 earliest stages (S3 and S4 Figs and S1 table). We hypothesized that inhibition of  
15 PfClpC resulted in an apicoplast segregation or division defect that leads to  
16 improper sorting of the organelle into daughter merozoites. Therefore, during  
17 every schizogony event only a small fraction of progeny receives an apicoplast  
18 from the mother cell. To test the possibility of an apicoplast-related sorting defect,  
19 we removed TMP for several replication cycles, inducing persistent growth arrest,  
20 and then adding it back and monitoring parasite growth. In the event of a uniform  
21 functional damage to all parasites in the culture, PfClpC re-activation would not  
22 lead to viable parasites, as *de novo* synthesis of the apicoplast is impossible.  
23 Nonetheless, we observed that re-addition of TMP could restore parasites growth,



1 indicating the presence of a small but undetectable sub-population of parasites  
2 that contains a functional apicoplast (Fig 6). This observation further supports a  
3 sorting defect rather than a general apicoplast dysfunction in the entire parasite  
4 population. Interestingly, TMP addition had the opposite effect on parasites that  
5 were rescued with IPP. These parasites started dying 48 hours after removing IPP  
6 despite addition of TMP (Fig 6), indicating that re-activation of PfClpC was not  
7 enough to sustain viability in a population of parasites that permanently lost the  
8 apicoplast. Future work will be needed in order to reveal how exactly PfClpC  
9 inhibition affects organelle sorting.

10 The question remains as to what is the molecular mechanism of PfClpC activity  
11 and how does it affect apicoplast function. There are two ClpC homologs in *P.*  
12 *falciparum*, PfClpC that is a nuclear encoded protein targeted to the apicoplast  
13 and PfClpM (PFC10\_API0060) that is encoded by the apicoplast genome. Our  
14 data show that their functions are not redundant and that PfClpC is essential for  
15 parasite survival and apicoplast function (Figs 2, 3, 4, and 5). In cyanobacteria  
16 and plant chloroplasts, ClpC orthologs, together with a ClpP protease, typically  
17 form an ATP-dependent proteolytic complex that degrades proteins to maintain  
18 protein homeostasis in the cell/ organelle [10,29]. PfClpC, but not PfClpM,  
19 possesses the entire conserved motif that is required to interact with ClpP  
20 proteases [30]. The *Plasmodium* ClpP homolog, PfClpP, was shown to have  
21 protease activity *in vitro* and localize to the apicoplast *in vivo* [16]. Several other  
22 studies provided structural data and binding analysis for two other apicoplast Clp  
23 proteins, the inactive protease PfClpR [31] and the adaptor protein PfClpS [32].

1 As expected, these two proteins have bacterial and chloroplast homologs, which  
2 are essential components of the Clp proteolytic complex [31,32]. Interestingly, it  
3 was shown that interfering with ClpP activity inhibits cell division in Gram-positive  
4 bacteria due to changes in rates of substrate degradation [33]. Further studies are  
5 required in order to understand whether a similar complex is indeed formed in the  
6 apicoplast of *P. falciparum*, and whether it plays an essential role in maintaining a  
7 functional apicoplast. Such investigation may reveal the link between the  
8 apicoplast sorting defect and the proteolytic ClpP/C complex in the form of  
9 unknown substrate/s that need to be degraded in order to facilitate proper  
10 organelle division and segregation.

11

1 **Fig 1: Generating PfClpC-DDD Conditional Mutants.**

2A. Mechanism of PfClpC conditional inhibition. The *pfclpc* locus was modified to  
3 contain a triple hemagglutinin (HA) tag and a DHFR-based destabilization  
4 domain (DDD). In the presence of trimethoprim (TMP) the DDD is stable and the  
5 chaperone is active. Upon TMP removal the chaperone binds the DDD intra-  
6 molecularly and cannot interact with client proteins, inhibiting normal activity.

7B. Single crossover homologous recombination enables the integration of the  
8 plasmid into the 3' end of the *pfclpc* gene (upper panel). Southern blot analysis of  
9 genomic DNA (bottom panel) isolated from parasite lines indicated above the  
10 lanes. The genomic DNA was digested with NcoI and XmnI. Bands expected  
11 from integration of the plasmid into the 3' end of the *pfclpc* gene were observed  
12 in two clones (1G8 and 2E10), isolated from two independent transfections  
13 (Red). A plasmid band was observed in the clones (blue), suggesting that a  
14 plasmid concatamer integrated into the gene. A single band indicative of the  
15 parental allele was observed for the parental strain (black) and it was absent in  
16 the integrant clones.

17C. Western blot of parasite lysates from parental line and two independent clones  
18 (1G8 and 2E10) probed with antibodies against HA (green) and EF1 $\alpha$  (loading  
19 control, red). The protein marker sizes that co-migrated with the probed protein  
20 are shown on the left.

21D. Immunofluorescence imaging of fixed unsynchronized PfClpC-DDD parasites  
22 stained with antibodies against HA (green) and DAPI (blue). Z-stack images were

1 deconvolved and projected as a combined single image. Scale bar, 5 $\mu$ m. One  
2 representative experiment out of four (two for each clone) is shown.

3

4 **Fig 2: PfClpC Activity is Essential for Parasite Growth.**

5A. Asynchronous PfClpC-DDD clones, 1G8 and 2E10, were grown with or without  
6 10 $\mu$ M TMP and parasitemia was monitored every 24 hours over 12 days via flow  
7 cytometry. During the course of the experiment cultures were cut back and data  
8 were calculated using the actual parasitemia multiplied by the dilution factors of  
9 each individual culture. 100% of relative parasitemia represents the highest value  
10 of calculated parasitemia. Growth inhibition is observed after 7-8 days post TMP  
11 removal, corresponding to roughly 3-4 asexual cycles. Data are fit to an  
12 exponential growth equation and are represented as mean  $\pm$  S.E.M. (n=3). One  
13 representative experiment out of three is shown.

14B. Asynchronous PfClpC-DDD parasites were incubated for 11 days without TMP,  
15 and on day 12 were seeded in a 96 well plate with varying concentrations of  
16 TMP. Parasitemia was measured after 5 days using flow cytometry showing an  
17 EC50 of 80nM. Data are fit to a dose-response equation and are represented as  
18 mean  $\pm$  S.E.M. (n=3). One representative experiment out of four is shown.

19C. TMP was removed from PfClpC-DDD parasites and parasite lysates were  
20 isolated every 24 or 48 hours over 11 days. PfClpC and EF1 $\alpha$  were visualized on  
21 Western blots using antibodies against HA (PfClpC-DDD, green) and EF1 $\alpha$   
22 (loading control, red). The protein marker sizes that co-migrated with the probed

1 protein are shown on the left. One representative experiment out of four is shown  
2 (two for each clone).

3

#### 4 **Fig 3: PfClpC Inhibition Disrupts the Localization of Apicoplast Proteins**

5A. PfClpC-DDD parasites were fixed and stained with antibodies against HA (red)  
6 and ACP (green). Both clones of PfClpC-DDD parasites are shown, indicated  
7 next to the images. Images from left to right are anti-HA, anti-ACP, DAPI,  
8 fluorescence merge and phase. Z-stack images were deconvolved and projected  
9 as a combined single image. Scale bar, 5 $\mu$ M.

10B. PfClpC-DDD parasites were incubated for 10 days without TMP and then fixed  
11 and stained with antibodies against HA (red), ACP (green) and DAPI (blue). Both  
12 clones of PfClpC-DDD parasites are shown, indicated next to the images.  
13 Images from left to right are anti-HA, anti-ACP, DAPI, fluorescence merge and  
14 phase. Z-stack images were deconvolved and projected as a combined single  
15 image. Scale bar, 5 $\mu$ M.

16C.

#### 17 **Fig 4: PfClpC Inhibition is Associated with Reduced Replication Efficiency**

18A. Hema 3 stained thin blood smears of PfClpC-DDD parasites that were grown for  
19 10 days without TMP. Both clones of PfClpC-DDD parasites are shown, as  
20 indicated above the images.

21B. TMP was removed from synchronized PfClpC-DDD parasites and thin blood  
22 smears of late stage schizonts were stained and analyzed using light  
23 microscopy. Parasites were counted, and the fraction of defective cells (as seen

1 in 4A) was calculated out of the total late-stage population ( $\leq 6$  nuclei). Data are  
2 shown from one representative experiment with clone 2E10. Two experiments  
3 (with technical triplicates) were performed with each clone.

4C. TMP was removed from synchronized PfClpC-DDD parasites and the DNA of the  
5 parasites was stained using Acridine Orange and was analyzed by flow  
6 cytometry during the 6<sup>th</sup> replication cycle. One representative image is shown  
7 (out of four experiments, two with each clone).

8D. TMP was removed from synchronized PfClpC-DDD parasites and the numbers of  
9 rings and late schizont stages was determined by flow cytometry. The ratio of  
10 rings to schizonts was calculated using the number of rings arising from  
11 schizonts in the previous generation. Cultures were re-synchronized at the  
12 beginning of each replication cycle using sorbitol. Data were normalized to the  
13 ring: schizont ratio in the presence of TMP. Data are shown for 1G8 clone. The  
14 experiment was performed twice for each clone (with technical triplicates in each  
15 experiment).

16

### 17 **Fig 5: IPP Rescues PfClpC Auto-inhibition**

18A. PfClpC-DDD parasites were grown for 10 days without TMP and supplemented  
19 with isopentenyl pyrophosphate (IPP). Parasitemia was measured using flow  
20 cytometry. During the course of the experiment cultures were subcultured and  
21 data were calculated using the actual parasitemia multiplied by the dilution  
22 factors of each individual culture. 100% of relative parasitemia represents the  
23 highest value of calculated parasitemia at the end of the experiment. Data are fit

1 to an exponential growth equation and are represented as mean  $\pm$  S.E.M. (n=3).

2 One of two (one for each clone) representative experiments is shown. Graph  
3 denotes data collected for 1G8 clone.

4B. Hema 3 stained thin blood smears of PfClpC-DDD parasites (1G8 clone) grown  
5 for 10 days with TMP (upper), without TMP (middle) or without TMP and  
6 supplemented with IPP (bottom). Two representative images for each condition  
7 are shown.

8C. PfClpC-DDD parasites (1G8 clone) grown for 10 days without TMP and  
9 supplemented with IPP. These PfClpC-DDD parasites were fixed and stained  
10 with antibodies against HA (red) and ACP (green). Images from left to right are  
11 anti-HA, anti-ACP, DAPI, fluorescence merge and phase. Z-stack images were  
12 deconvolved and projected as a combined single image. Scale bar, 5 $\mu$ M.

13D. Synchronized PfClpC-DDD parasites were grown in the absence of TMP and  
14 presence of IPP and DNA samples were taken at the beginning of each  
15 replication cycle for quantitative Real Time PCR analysis. Apicoplast: nuclear  
16 genome ratio was calculated for each replication cycle. Mitochondria: nuclear  
17 genome ratio served as a control. Genome ratios were normalized to parasites  
18 grown in the presence of TMP. Data are represented as mean  $\pm$  S.E.M (n=3)  
19 from one representative experiment (out of four, two for each clone).

20E.

## 21 **Fig 6: PfClpC Inhibition is Reversible**

22A. PfClpC tagged parasites were grown for 14 days without TMP (red line), or  
23 without TMP and supplemented with IPP (green line). During the course of the

1 experiment cultures were subcultured and data were calculated using the actual  
2 parasitemia multiplied by the dilution factors of each individual culture. 100% of  
3 relative parasitemia represents the highest value of calculated parasitemia at the  
4 end of the experiment. Data are fit to an exponential growth equation and are  
5 represented as mean  $\pm$  S.E.M. (n=3). One representative experiment out of two  
6 for each clone is shown.

7B. On day 14 IPP was removed from the media and TMP was added back to all  
8 parasite cultures and parasitemia was measured using flow cytometry. 100% of  
9 relative parasitemia represents the highest parasitemia value at the beginning of  
10 the experiment. Data are represented as mean  $\pm$  S.E.M. (n=3). One  
11 representative experiment out of two for each clone is shown.

12

### 13 **S1 Fig: PfClpC Auto-inhibition Interferes with Transit Peptide Processing**

14 TMP was removed from PfClpC-DDD parasites and parasite lysates were  
15 isolated every 24 to 48 hours over 13 days. PfClpC and Plasmepsin V (PMV)  
16 were visualized on Western blots using antibodies against HA (PfClpC-DDD) and  
17 PMV (loading control).

18

### 19 **S2 Fig: PfClpC inhibition does not affect early stage development**

20 Hema 3 stained thin blood smears of early stage PfClpC-DDD parasites that  
21 were grown for 10 days without TMP. Both clones of PfClpC-DDD parasites are  
22 shown, indicated above the images.

23



1 **S3 Fig: Early Stage PfClpC-DDD parasites are positive for HA**

2 Synchronized PfClpC-DDD parasites incubated for 10 days without TMP.  
3 Schizont stage parasites were isolated on a percoll gradient following by a  
4 sorbitol treatment 5 hours later to obtain early rings (0-5 hours post invasion).  
5 Parasites were fixed and stained with DAPI to visualize DNA and antibodies  
6 against HA to observe PfClpC-DDD. Parasites were detected using Imaging flow  
7 cytometry (ImageStream). Images from left to right are anti-HA, DAPI,  
8 fluorescence merge and phase. Representative images of fixed parasitized  
9 RBCs as observes via the imaging flow cytometry.

10

11

12

| Clone/ condition | Infected cells positive for HA (%) |
|------------------|------------------------------------|
| <b>1G8+TMP</b>   | 99.76                              |
| <b>1G8-TMP</b>   | 96.93                              |
| <b>2E10+TMP</b>  | 99.62                              |
| <b>2E10-TMP</b>  | 98.96                              |

13

14 **S1 Table: Early Stage PfClpC-DDD Parasites are Positive for HA**

15 Synchronized PfClpC-DDD parasites incubated for 10 days without TMP.  
16 Schizont stage PfClpC-DDD parasites were isolated on a percoll gradient  
17 following by a sorbitol treatment 5 hours later to obtain early rings (0-5 hours post  
18 invasion). Parasites were fixed and stained with DAPI to visualize DNA and  
19 antibodies against HA to observe PfClpC-DDD. Parasites were detected using  
20 Imaging flow cytometry (ImageStream). The able shows a summary of the results  
21 as percentage of parasitized RBCs positive for HA staining.

1

2 **S4 Fig: Vesicle-like Structures are Present in Early Stage PfClpC-DDD**

3 **Parasites**

4 Synchronized PfClpC-DDD parasites incubated for 10 days without TMP.

5 Schizont stage parasites were isolated on a percoll gradient following by a  
6 sorbitol treatment 5 hours later to obtain early rings (0-5 hours post invasion).

7 Parasites were fixed and stained with DAPI to visualize DNA and antibodies  
8 against HA to observe PfClpC-DDD. Images from left to right are phase, anti-HA,

9 anti-ACP, DAPI, and fluorescence merge. Z-stack images were deconvolved and

10 projected as a combined single image. Scale bar, 5 $\mu$ M.

11

# 1 **Materials and Methods**

## 2 **Plasmid construction**

3 Genomic DNAs were isolated from *P. falciparum* using the QIAamp DNA blood  
4 kit (QIAGEN). Constructs utilized in this study were confirmed by sequencing.  
5 PCR products were inserted into the respective plasmids using the In-Fusion  
6 cloning system (Clontech). For generation of PfClpC-DDD a 1-kb homologous  
7 sequence from the 3'-end of the *pfclpc* gene (not including the stop codon) was  
8 amplified by PCR using primers 5'-  
9 cactatagaactcgagCCAAATAACCTATTGGTACTCTTCTATTATGTGGTTCATC  
10 AGG-3' and 5'-  
11 cgtatgggtacctaggAGATGAAAATTGTTGAACTGGTGCTTTTATTAATTGTACTTT  
12 AA-3' and was inserted into pHADB [13] using restriction sites XhoI and AvrII  
13 (New England Biolabs).

## 14 **Cell culture and transfections**

15 Parasites were cultured in RPMI medium supplemented with Albumax I (Gibco)  
16 and transfected as described earlier [34,35]. pPfClpC-HADB was transfected in  
17 duplicates into 3D7-derived parental strain PM1KO which contains a hDHFR  
18 expression cassette conferring resistance to TMP [36]. Selection, drug cycling  
19 and cloning were performed as described [17] in the presence of 10  $\mu$ M of TMP  
20 (Sigma). Integration was detected after one round of drug cycling with blasticidin  
21 (Sigma). Two clones from 2 independent transfections, 1G8 and 2E10, were  
22 isolated via limiting dilutions and used for subsequent experiments.

1 For IPP rescue, media was supplemented with 200  $\mu$ M of IPP (Isoprenoids LC) in  
2 PBS.

### 3 **Growth assays**

4 For asynchronous growth assays parasites were washed twice and incubated in  
5 the required medium. Throughout the course of the experiment parasites were  
6 sub-cultured to avoid high parasite density and parasitemia was monitored every  
7 24 hours via flow cytometry. Relative parasitemia at each time point was back  
8 calculated based on actual parasitemia multiplied by the relevant dilution factors.

9 Parasitemia in the presence of TMP at the end of each experiment was set as  
10 the highest relative parasitemia and was used to normalize parasites growth.

11 Data were fit to exponential growth equations using Prism (GraphPad Software,  
12 Inc.)

13 To generate an EC50 curve for TMP, asynchronous PfClpC-DDD parasites were  
14 incubated for 11 days without TMP, and on day 12 were seeded in a 96 well  
15 plate with varying concentrations of TMP. Parasitemia was measured after 5  
16 days using flow cytometry. Data were fit to a dose-response equation using  
17 Prism (GraphPad Software, Inc.).

18 To determine replication rate (rings: schizonts ratio), TMP was removed from  
19 percoll-isolated schizonts-stage parasites and parasites were allowed to egress  
20 and reinvade fresh RBCs. Parasitemia was monitored by flow cytometry and  
21 microscopy. The ratio of rings to schizonts was calculated using number of rings  
22 arising from schizonts in the previous generation. At the beginning of each  
23 replication cycle parasites were re-synchronized using Sorbitol, and sub-cultured

1 when required. For each replication cycle data were normalized to rings:  
2 schizonts ratio in the presence of TMP.

3 To determine the fraction of morphologically aberrant schizonts thin blood  
4 smears of synchronized PfClpC-DDD parasites were performed at the final  
5 stages of each replication cycle and the fraction of defective cells was calculated  
6 based on the total late schizont stage parasite counts.

### 7 **Southern blot**

8 Southern blots were performed with genomic DNA isolated using the Qiagen  
9 Blood and Cell Culture kit. 10 µg of DNA was digested overnight with NcoI and  
10 XmnI (New England Biolabs) and integrants were screened using biotin-labeled  
11 probes against the 3'-end of the *pfclpc* ORF. Southern blot was performed as  
12 described earlier [37]. The probe was labeled using biotinylated Biotin-16-dUTP  
13 (Sigma). The biotinylated probe was detected on blots using IRDye 800CW  
14 Streptavidin conjugated dye (LICOR Biosciences) and was imaged, processed  
15 and analyzed using the Odyssey infrared imaging system software (LICOR  
16 Biosciences).

### 17 **Western blot**

18 Western blots were performed as described previously [18]. Briefly, parasites  
19 were collected and host red blood cells were permeabilized selectively by  
20 treatment with ice-cold 0.04% saponin in PBS for 10 min, followed by a wash in  
21 ice-cold PBS. Cells were lysed using RIPA buffer, sonicated, and cleared by  
22 centrifugation at 4°C. The antibodies used in this study were rat monoclonal anti-  
23 HA, 3F10 (1:3000) (Roche), mouse monoclonal anti-PMV (from D. Goldberg, 1:

1 400) and rabbit polyclonal anti-EF1 $\alpha$  (from D. Goldberg, 1: 2000). The secondary  
2 antibodies that were used are IRDye 680CW goat anti-rabbit IgG and IRDye  
3 800CW goat anti-mouse IgG (LICOR Biosciences, 1:20,000). The Western blot  
4 images were processed and analyzed using the Odyssey infrared imaging  
5 system software (LICOR Biosciences).

## 6 **Microscopy and image processing**

7 For IFA cells were fixed using a mix of 4% Paraformaldehyde and 0.015%  
8 glutaraldehyde and permeabilized using 0.1% Triton-X100. Primary antibodies  
9 used are rat anti-HA clone 3F10 (Roche, 1:100) and rabbit anti-ACP (from G.  
10 Mcfadden, 1:10,000). Secondary antibodies used are Alexa Fluor 488 and Alexa  
11 Fluor 546 (Life Technologies, 1:100). Cells were mounted on ProLong Diamond  
12 with DAPI (Invitrogen) and were imaged using DeltaVision II microscope system  
13 with an Olympus IX-71 inverted microscope using a 100X objective. All images  
14 were collected as Z-stack, were deconvolved using the DVII acquisition software  
15 SoftWorx and displayed as maximum intensity projection. Image processing,  
16 analysis and display were preformed using SoftWorx and Adobe Photoshop.  
17 Adjustments to brightness and contrast were made for display purposes. Thin  
18 blood smears were stained using Hema 3 stain set (PRTOCOL/ Fisher  
19 Diagnostics) and were imaged on a Nikon Eclipse E400 microscope.

## 20 **Flow cytometry**

21 Aliquots of parasite cultures (5  $\mu$ l) were stained with 1.5 mg/ml Acridine Orange  
22 (Molecular Probes) in PBS. The fluorescence profiles of infected erythrocytes

1 were measured by flow cytometry on a CyAn ADP (Beckman Coulter, Hialeah,  
2 Florida) and analyzed by FlowJo software (Treestar, Inc., Ashland, Oregon). The  
3 parasitemia data were fit to standard growth curve or dose–response using Prism  
4 (GraphPad Software, Inc.).

## 5 **Quantitative Real Time PCR**

6 Synchronized ring stage parasites samples were collected at the beginning of  
7 each replication cycle and genomic DNA was isolated by saponin lysis to remove  
8 extracellular DNA. Genomic DNA was purified using QIAamp blood kits (Qiagen).  
9 Primers that amplify segments from genes encoded by nuclear or organelles  
10 genomes were designed using RealTime qPCR Assay Entry (IDT). *cht1*  
11 (nuclear): 5'-TCCATTGGTGATTTTGTAAAGACTG-3' and 5'-  
12 CTAATTGTTTCATTATGTGCAGCATTATC-3'. *tufA* (apicoplast): 5'-  
13 AATTAACACAAGCACAATCCGG-3' and 5'-GGTTTATGACGACCACCTTCT-3'.  
14 *cytb3* (mitochondria): 5'-CTGCTTTCGTTGGTTATGTCTTAC-3' and 5'-  
15 CTCACAGTATATCCTCCACATATCC-3'. Reactions contained template DNA,  
16 0.5 µM of gene specific primers, and IQ™ SYBR Green Supermix (BIORAD).  
17 Quantitative real-time PCR was carried out in triplicates and was performed at a  
18 2-step reaction with 95°C denaturation and 56°C annealing and extension for 35  
19 cycles on a CFX96 Real-Time System (BIORAD). Relative quantification of target  
20 genes was determined using Bio-Rad CFX manager 3.1 software. Standard  
21 curves for each primers set were obtained by using different dilutions of control  
22 gDNA isolated from parasites grown in the presence of TMP (20 to 0.2 ng) as  
23 template, and these standard curves were used to determine primers efficiency.

1 For each replication cycle number, the organelle: nuclear genome ratio of the –  
2 TMP+IPP treated parasites was calculated relative to that of the +TMP control.

### 3 **Imaging flow cytometry**

4 Synchronized PfClpC-DDD parasites incubated for 10 days without TMP and  
5 then were isolated on a percoll gradient following by a sorbitol treatment 5 hours  
6 later to obtain early rings (0-5 hours post invasion). Cells were fixed and stained  
7 with anti HA antibody as described above and nuclei were stained using DAPI  
8 from Amnis Intracellular staining kit (EMD MILIPORE). Data were collected on  
9 ImageStream X Mark II (EMD MILIPORE) and an automated collection of a  
10 statistically large number of cells (10,000) was performed. Data were analyzed  
11 using IDEAS software version 6.2.

12

13



## 1 **Acknowledgements**

2 We thank Geoffrey McFadden for anti-ACP antibody and Dan Goldberg for anti-  
3 PMV and anti EF1 $\alpha$  antibodies; Drew Etheridge for comments on the manuscript;  
4 Julie Nelson at the CTEGD Cytometry Shared Resource Laboratory for help with  
5 flow cytometry and analysis; and Muthugapatti Kandasamy at the Biomedical  
6 Microscopy Core at the University of Georgia for help with microscopy. We  
7 acknowledge the assistance of the Children's Healthcare of Atlanta and Emory  
8 University Pediatric Flow Cytometry Core for imaging flow cytometry.

9

10

11

12

13

14

15

16

17

18

19

## 1 **References**

- 2 1. World Health Organization. World Malaria Report 2015. WHO, Geneva.  
3 2015.
- 4 2. Hovlid ML, Winzeler EA. Phenotypic Screens in Antimalarial Drug  
5 Discovery. *Trends Parasitol.* 2016;32: 697–707.
- 6 3. Wells TNC, van Huijsduijnen RH, Van Voorhis WC. Malaria medicines: a  
7 glass half full? *Nat Rev Drug Discov.* 2015;14: 424–442.
- 8 4. McFadden GI. Plastid in human parasites. *Nature.* 1996;381: 482–482.
- 9 5. van Dooren GG, Striepen B. The algal past and parasite present of the  
10 apicoplast. *Annu Rev Microbiol.* 2013;67: 271–289.
- 11 6. Goodman CD, Su V, McFadden GI. The effects of anti-bacterials on the  
12 malaria parasite *Plasmodium falciparum*. *Mol Biochem Parasitol.* 2007;152:  
13 181–191.
- 14 7. Fichera ME, Roos DS. A plastid organelle as a drug target in apicomplexan  
15 parasites. *Nature.* 1997;390: 407–409.
- 16 8. Dahl EL, Rosenthal PJ. Multiple Antibiotics Exert Delayed Effects against  
17 the *Plasmodium falciparum* Apicoplast. *Antimicrob Agents Chemother.*  
18 2007;51: 3485–3490.
- 19 9. Trösch R, Mühlhaus T, Schroda M, Willmund F. ATP-dependent molecular  
20 chaperones in plastids — More complex than expected. *Biochim Biophys*  
21 *Acta.* 2015;1847: 872–888.
- 22 10. Nishimura K, van Wijk KJ. Organization, function and substrates of the  
23 essential Clp protease system in plastids. *Biochim Biophys Acta.*  
24 2015;1847: 915–930.
- 25 11. Elsworth B, Matthews K, Nie CQ, Kalanon M, Charnaud SC, Sanders PR,  
26 et al. PTEX is an essential nexus for protein export in malaria parasites.  
27 *Nature.* 2014;511: 587–591.
- 28 12. de Koning-Ward TF, Gilson PR, Boddey JA, Rug M, Smith BJ, Papenfuss  
29 AT, et al. A newly discovered protein export machine in malaria parasites.  
30 *Nature.* 2009;459: 945–949.
- 31 13. Beck JR, Muralidharan V, Oksman A, Goldberg DE. PTEX component  
32 HSP101 mediates export of diverse malaria effectors into host  
33 erythrocytes. *Nature.* 2014;511: 592–595.
- 34 14. Jain S, Rathore S, Asad M, Hossain ME, Sinha D, Datta G, et al. The

- 1 prokaryotic ClpQ protease plays a key role in growth and development of  
2 mitochondria in *Plasmodium falciparum*. *Cell Microbiol.* 2013;15: 1660-73
- 3 15. Bakkouri EI M, Pow A, Mulichak A, Cheung KLY, Artz JD, Amani M, et al.  
4 The Clp chaperones and proteases of the human malaria parasite  
5 *Plasmodium falciparum*. *J Mol Biol.* 2010;404: 456–477.
- 6 16. Rathore S, Sinha D, Asad M, Böttcher T, Afrin F, Chauhan VS, et al. A  
7 cyanobacterial serine protease of *Plasmodium falciparum* is targeted to the  
8 apicoplast and plays an important role in its growth and development. *Mol*  
9 *Microbiol.* 2010;77: 873–890.
- 10 17. Muralidharan V, Oksman A, Pal P, Lindquist S, Goldberg DE. *Plasmodium*  
11 *falciparum* heat shock protein 110 stabilizes the asparagine repeat-rich  
12 parasite proteome during malarial fevers. *Nat Commun.* 2012;3: 1310.
- 13 18. Muralidharan V, Oksman A, Iwamoto M, Wandless TJ, Goldberg DE.  
14 Asparagine repeat function in a *Plasmodium falciparum* protein assessed  
15 via a regulatable fluorescent affinity tag. *Proc Natl Acad Sci.* 2011;108:  
16 4411–4416.
- 17 19. Nacer A, Claes A, Roberts A, Scheidig Benatar C, Sakamoto H, Ghorbal  
18 M, et al. Discovery of a novel and conserved *Plasmodium falciparum*  
19 exported protein that is important for adhesion of PfEMP1 at the surface of  
20 infected erythrocytes. *Cell Microbiol.* 2015;17: 1205–1216.
- 21 20. Waller RF, Keeling PJ, Donald RG, Striepen B, Handman E, Lang-  
22 Unnasch N, et al. Nuclear-encoded proteins target to the plastid in  
23 *Toxoplasma gondii* and *Plasmodium falciparum*. *Proc Natl Acad Sci.*  
24 1998;95: 12352–12357.
- 25 21. Foth BJ, Ralph SA, Tonkin CJ, Struck NS, Fraunholz M, Roos DS, et al.  
26 Dissecting Apicoplast Targeting in the Malaria Parasite *Plasmodium*  
27 *falciparum*. *Science.* 2003;299: 705–708.
- 28 22. Waller RF, Reed MB, Cowman AF, Mcfadden GI. Protein trafficking to the  
29 plastid of *Plasmodium falciparum* is via the secretory pathway. *EMBO J.*  
30 2000;19: 1794–1802.
- 31 23. Yeh E, DeRisi JL. Chemical rescue of malaria parasites lacking an  
32 apicoplast defines organelle function in blood-stage *Plasmodium*  
33 *falciparum*. *PLoS Biol.* 2011;9: e1001138.
- 34 24. Frees D, Gerth U, Ingmer H. Clp chaperones and proteases are central in  
35 stress survival, virulence and antibiotic resistance of *Staphylococcus*  
36 *aureus*. *Int J Med Microbiol.* 2014;304: 142–149.
- 37 25. Böttcher T, Sieber SA.  $\beta$ -Lactones as Specific Inhibitors of ClpP Attenuate

- 1 the Production of Extracellular Virulence Factors of *Staphylococcus*  
2 *aureus*. *J Am Chem Soc.* 2008;130: 14400–14401.
- 3 26. Brötz-Oesterhelt H, Sass P. Bacterial caseinolytic proteases as novel  
4 targets for antibacterial treatment. *Int J Med Microbiol.* 2014;304: 23–30.
- 5 27. Gisselberg JE, Dellibovi-Ragheb TA, Matthews KA, Bosch G, Prigge ST.  
6 The suf iron-sulfur cluster synthesis pathway is required for apicoplast  
7 maintenance in malaria parasites. *PLoS Pathogens.* 2013;9: e1003655.
- 8 28. Bowman JD, Merino EF, Brooks CF, Striepen B, Carlier PR, Cassera MB.  
9 Antiapicoplast and gametocytocidal screening to identify the mechanisms  
10 of action of compounds within the malaria box. *Antimicrob Agents*  
11 *Chemother.* 2014;58: 811–819.
- 12 29. Olivares AO, Baker TA, Sauer RT. Mechanistic insights into bacterial AAA+  
13 proteases and protein-remodelling machines. *Nat Rev Micro.* 2016;14: 33–  
14 44.
- 15 30. Kim YI, Levchenko I, Fraczkowska K, Woodruff RV, Sauer RT, Baker TA.  
16 Molecular determinants of complex formation between Clp/Hsp100  
17 ATPases and the ClpP peptidase. *Nat Struct Biol.* 2001;8: 230–233.
- 18 31. Bakkouri El M, Rathore S, Calmettes C, Wernimont AK, Liu K, Sinha D, et  
19 al. Structural insights into the inactive subunit of the apicoplast-localized  
20 caseinolytic protease complex of *Plasmodium falciparum*. *J Biol Chem.*  
21 2013;288: 1022–1031.
- 22 32. AhYoung AP, Koehl A, Vizcarra CL, Cascio D, Egea PF. Structure of a  
23 putative ClpS N-end rule adaptor protein from the malaria pathogen  
24 *Plasmodium falciparum*. *Protein Sci.* 2016;25: 689–701.
- 25 33. Sass P, Josten M, Famulla K, Schiffer G, Sahl H-G, Hamoen L, et al.  
26 Antibiotic acyldepsipeptides activate ClpP peptidase to degrade the cell  
27 division protein FtsZ. *Proc Natl Acad Sci.* 2011;108: 17474–17479.
- 28 34. Drew ME, Banerjee R, Uffman EW, Gilbertson S, Rosenthal PJ, Goldberg  
29 DE. *Plasmodium* Food Vacuole Plasmepsins Are Activated by Falcipains. *J*  
30 *Biol Chem.* 2008;283: 12870–12876.
- 31 35. Russo I, Oksman A, Goldberg DE. Fatty acid acylation regulates trafficking  
32 of the unusual *Plasmodium falciparum* calpain to the nucleolus. *Mol*  
33 *Microbiol.* 2009;72: 229–245.
- 34 36. Liu J, Gluzman IY, Drew ME, Goldberg DE. The role of *Plasmodium*  
35 *falciparum* food vacuole plasmepsins. *J Biol Chem.* 2005;280: 1432–1437.
- 36 37. Klemba M, Gluzman I, Goldberg DE. A *Plasmodium falciparum* dipeptidyl

1            aminopeptidase I participates in vacuolar hemoglobin degradation. J Biol  
2            Chem. 2004;279: 43000–43007.

3

**A**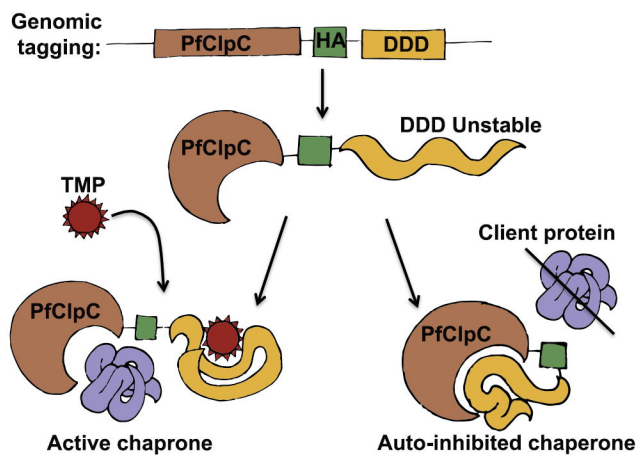**C**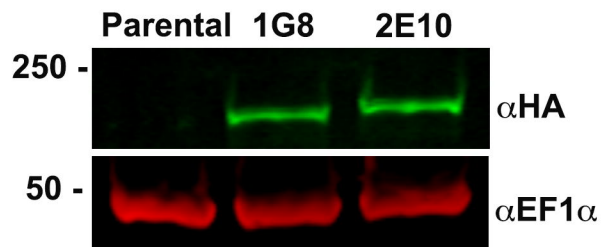**B**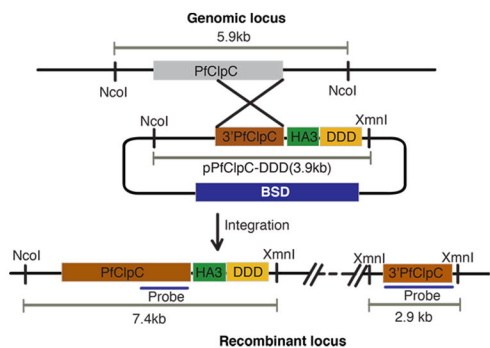**D**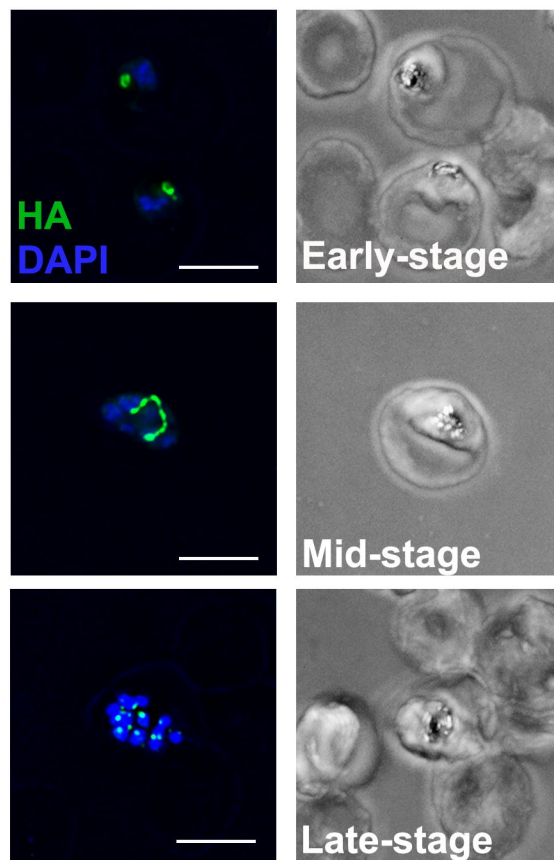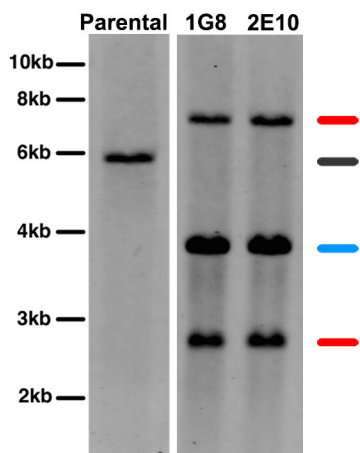

**A**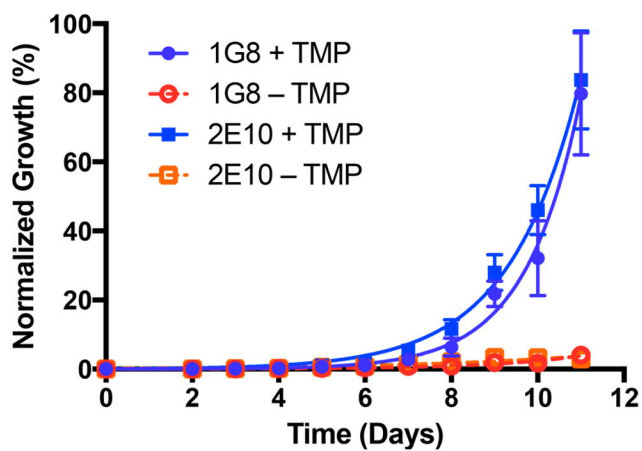**B**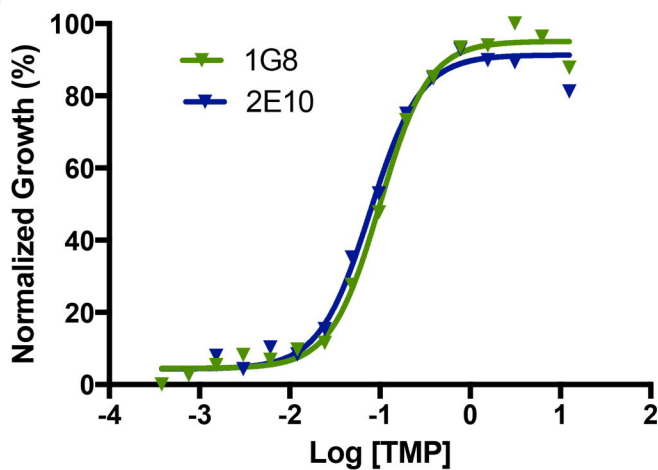**C**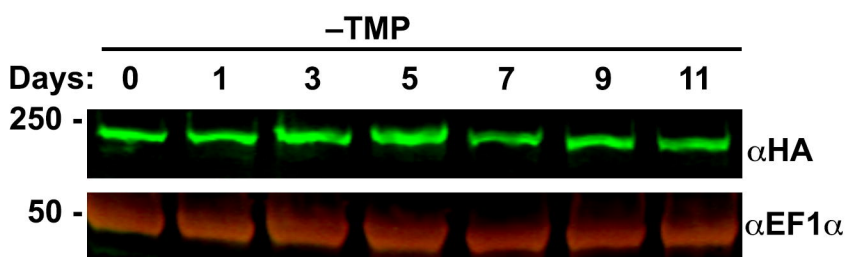

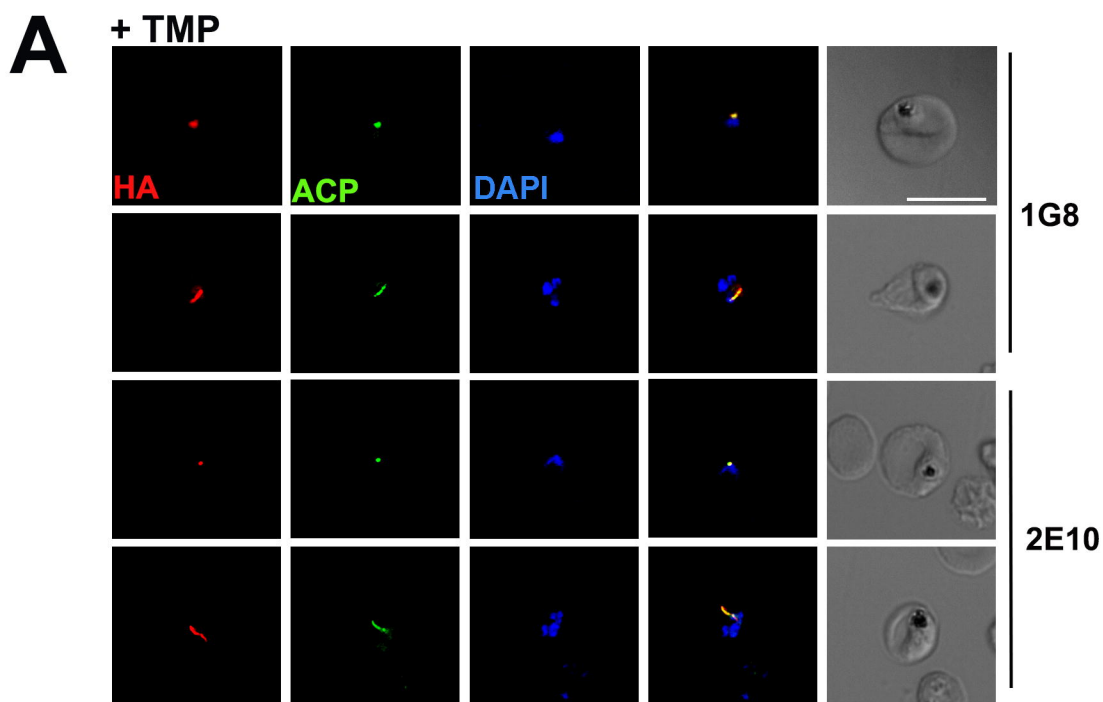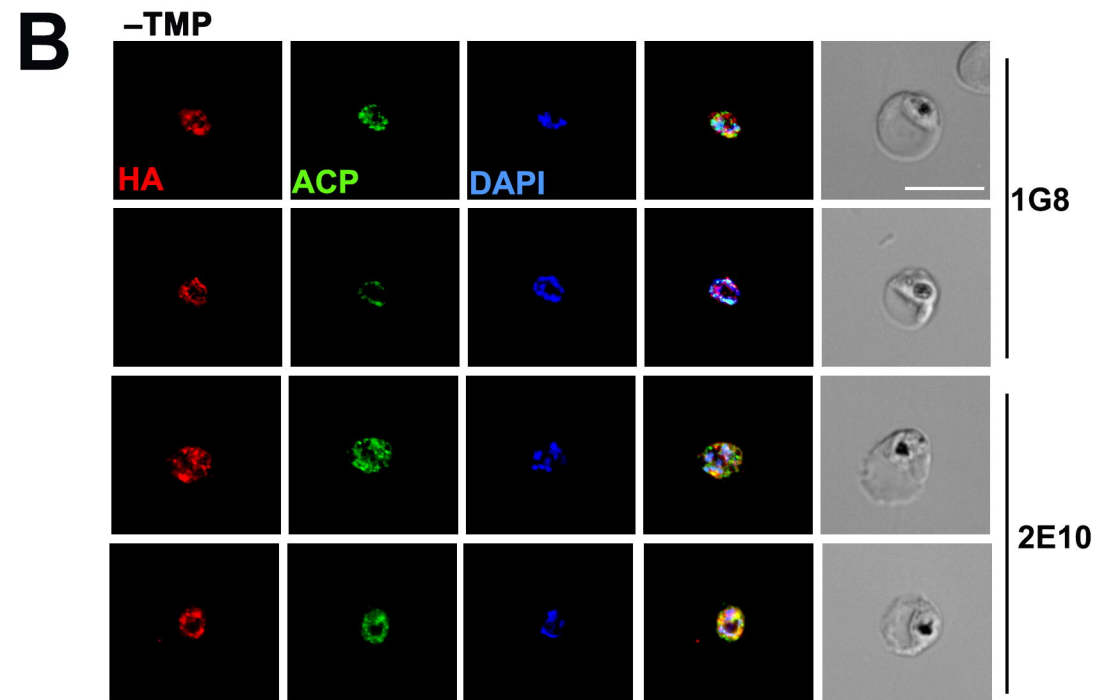



**A**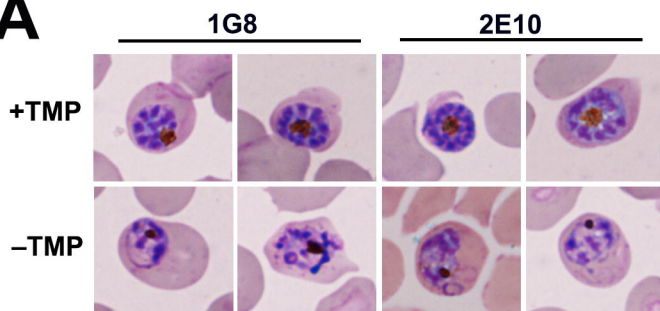**B**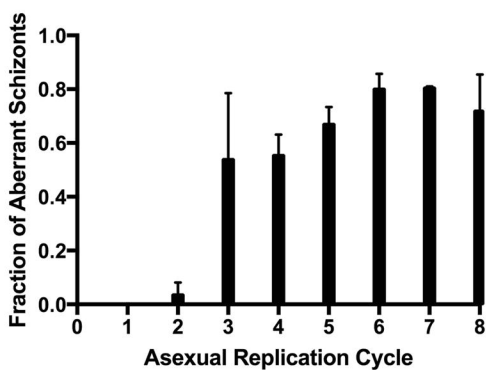**C**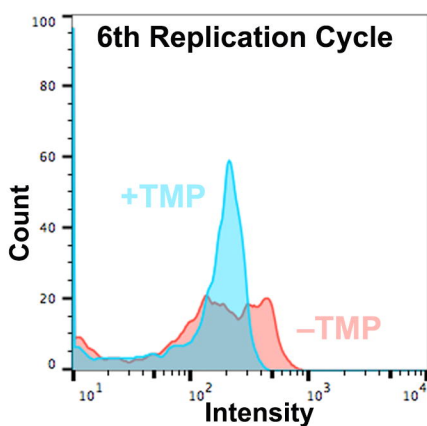**D**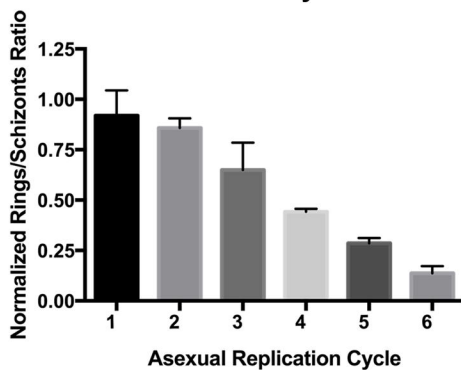

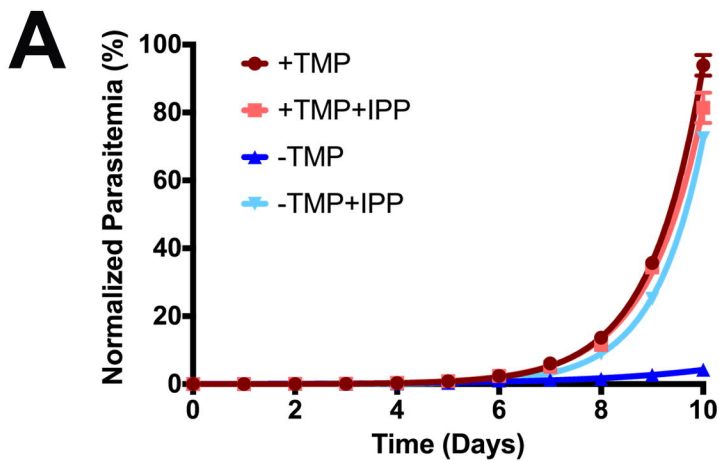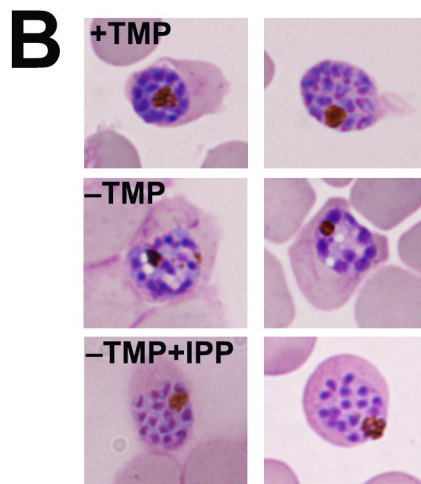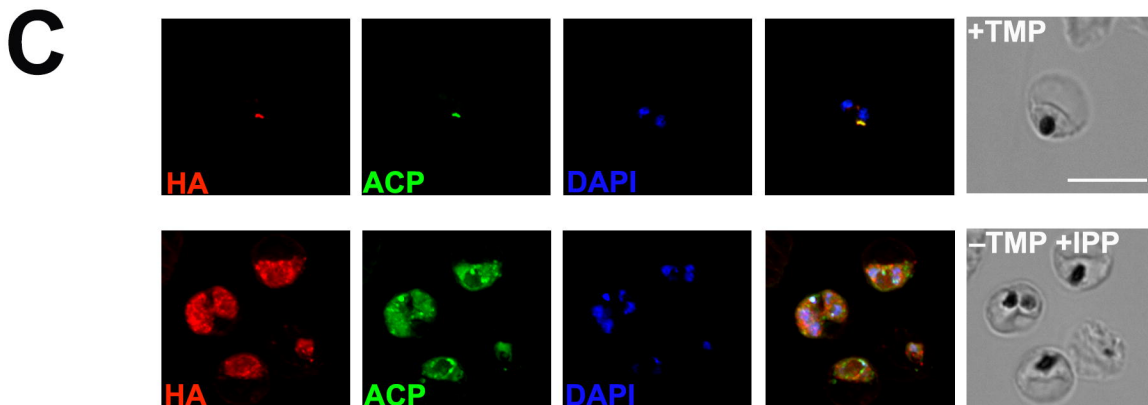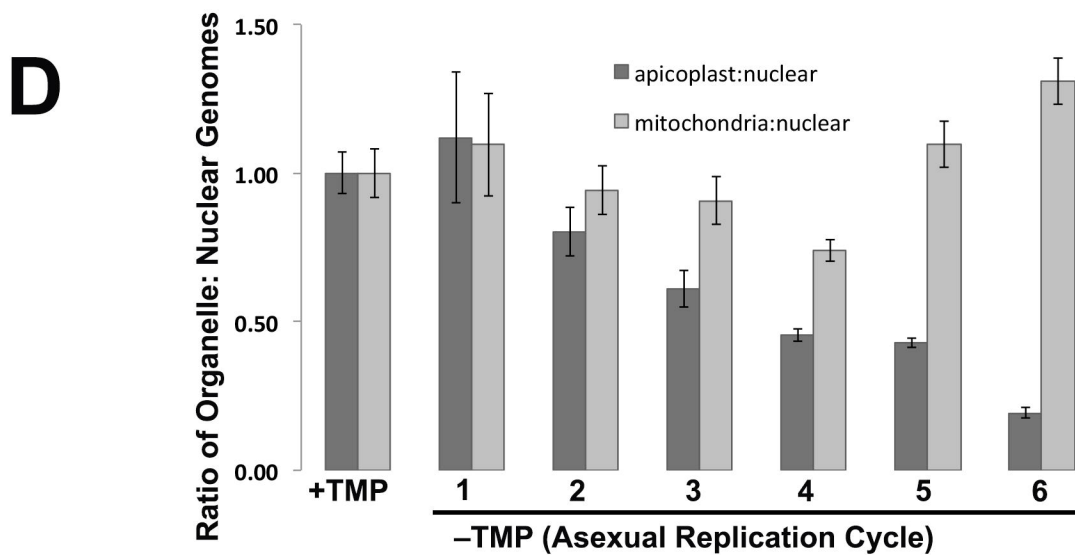

**A**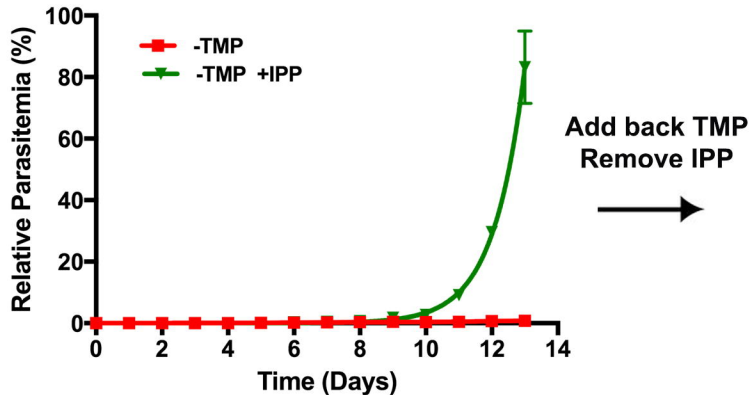**B**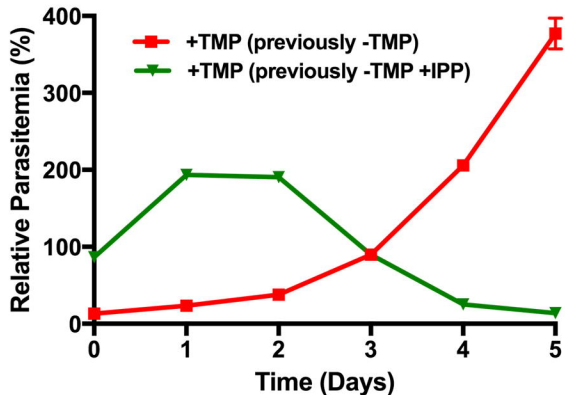

Source: http://biorxiv.org/content/10.1101/080408v1.full.pdf
